# Supplementary material for: Integrated electrodes and electrospray emitter for polymer microfluidic nanospray–MS interface
Source: Royal Society of Chemistry journal article supplement (doi:10.1039/c6ay00197a), 2016-01-01

## Supplemental Information

**Figure S1 Effect of electrospray voltage on glutathione signal intensity/response.** While the spray voltage of 1.85 kV showed the highest signal intensity, it was not robust for all chips used. Therefore, 2.5 kV was used for our experiments.

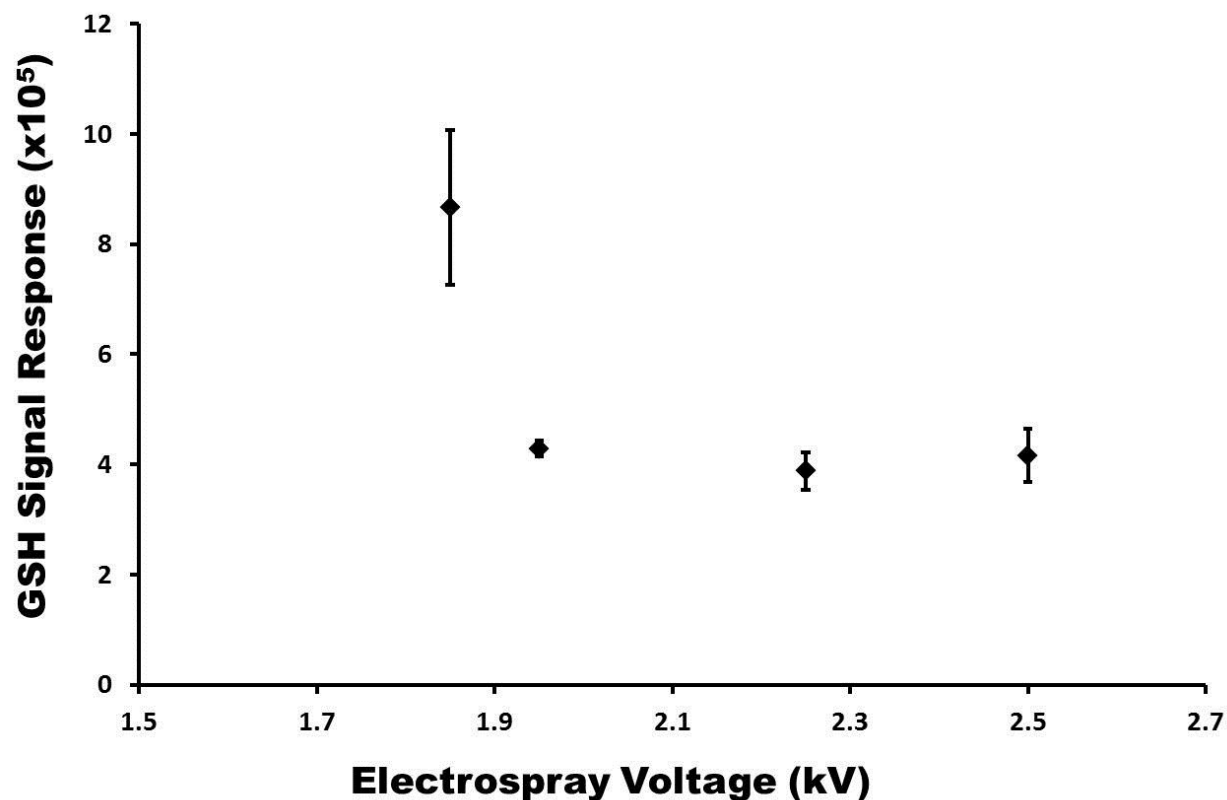

Supplement: c6ay00197a1.pdf [file c6ay00197a1.pdf]
